# Supplementary material for: Neuroprotection and immunomodulation by xenografted human mesenchymal stem cells following spinal cord ventral root avulsion
Source: PubMed Central journal article supplement (PMC4637826; doi:10.1038/srep16167), 2015-11-09

**Neuroprotection and immunomodulation by xenografted human mesenchymal stem cells following spinal cord ventral root avulsion**

Thiago B. Ribeiro<sup>1</sup>, Adriana S.S. Duarte<sup>1</sup>, Ana Leda F. Longhini<sup>1,2</sup>, Fernando Pradella<sup>2</sup>, Alessandro S. Farias<sup>2</sup>, Angela C.M. Luzo<sup>1</sup>, Alexandre L. R. Oliveira<sup>3</sup>, Sara Teresinha Olalla Saad<sup>1</sup>.

<sup>1</sup>Hematology and Hemotherapy Center-University of Campinas/Hemocentro-Unicamp, Instituto Nacional de Ciência e Tecnologia do Sangue, Campinas, São Paulo, Brazil

<sup>2</sup>Neuroimmunomodulation Group, Dept. Genetics, Evolution and Bioagents – University of Campinas – Campinas –Brazil

<sup>3</sup>Dept. of Structural and Functional Biology - Institute of Biology - University of Campinas – Campinas –Brazil

*Running title:* Neuroprotection and immunomodulation by xenografted human mesenchymal stem

*Key words xenografted, mesenchymal stem cells, immunomodulation,*

Corresponding Author:

Sara Teresinha Olalla Saad, MD, PhD

Hematology and Hemotherapy Center, University of Campinas

Rua Carlos Chagas, 480, CEP 13083-878

Campinas, SP, Brazil

Phone: 55-19-35218734; Fax: 55-19-3289-1089

E-mail: sara@unicamp.br

Supplement Figure 1 – Human AT-MSC grafting in rat spinal cord. (A) Schematic figure of the surgery and injection procedure. (B) Injection site of AT-MSC (arrow) in the spinal cord ventral horn submitted to avulsion (10x) (C) Qdot 655 labelled AT-MSC (red) with qdot655 (D) merge figure showing the presence of AT-MSC in the injection site area (20x).

Supplement Figure 2 – Representative figures and characterization of AT-MSC at 4<sup>th</sup> passage. (A) Antigen membrane surface characterized by flow cytometry shows a typical expression pattern of MSC. Cells express CD90, CD73, CD105, CD29 and HLA-ABC and lack expression of CD34, CD45 and HLA-DR. (B) AT-MSC is plastic adherent and present fibroblast morphology. AT-MSC were differentiated into mesodermal lineage, such as (C) osteogenic lineage characterized by calcium deposition (Red S Alzarín staining); (D) adipogenic lineage characterized by lipid vesicles (Oil Red O staining); and (E) chondrogenic lineage characterized by glycosaminoglycan matrix production (Alcian blue staining).

**A**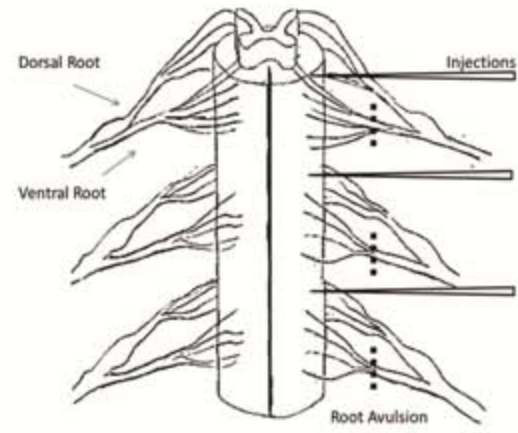**C**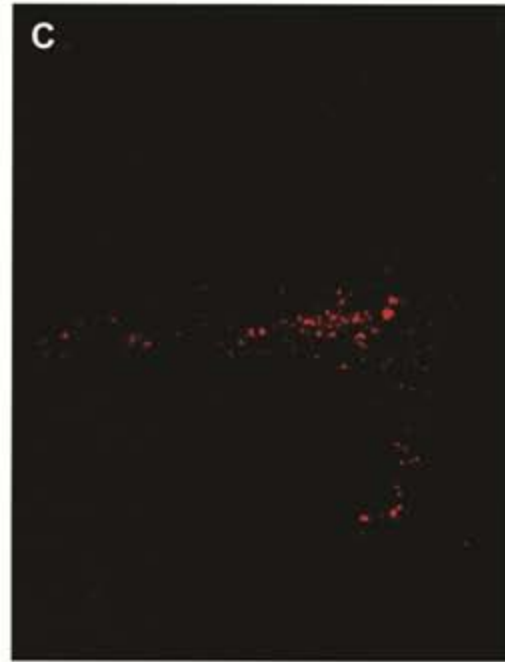**B**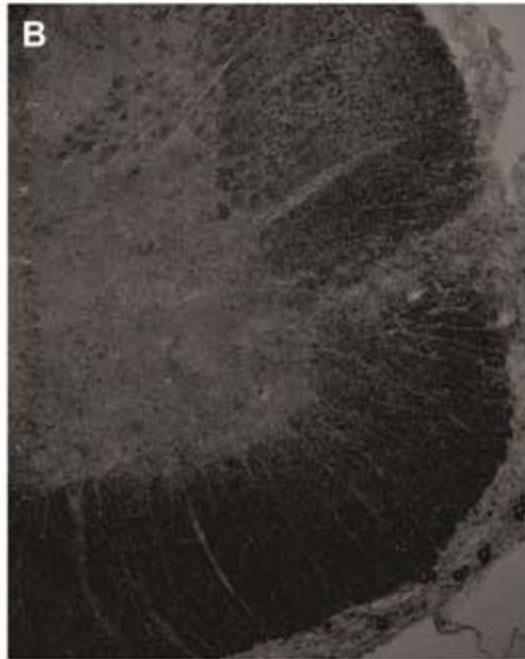**D**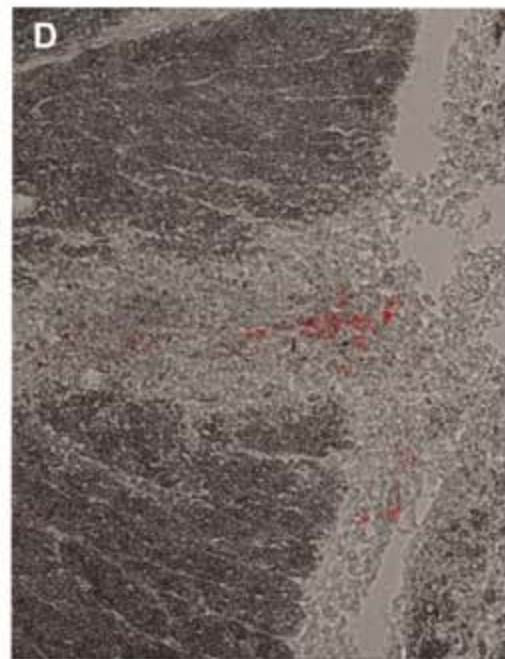

**A**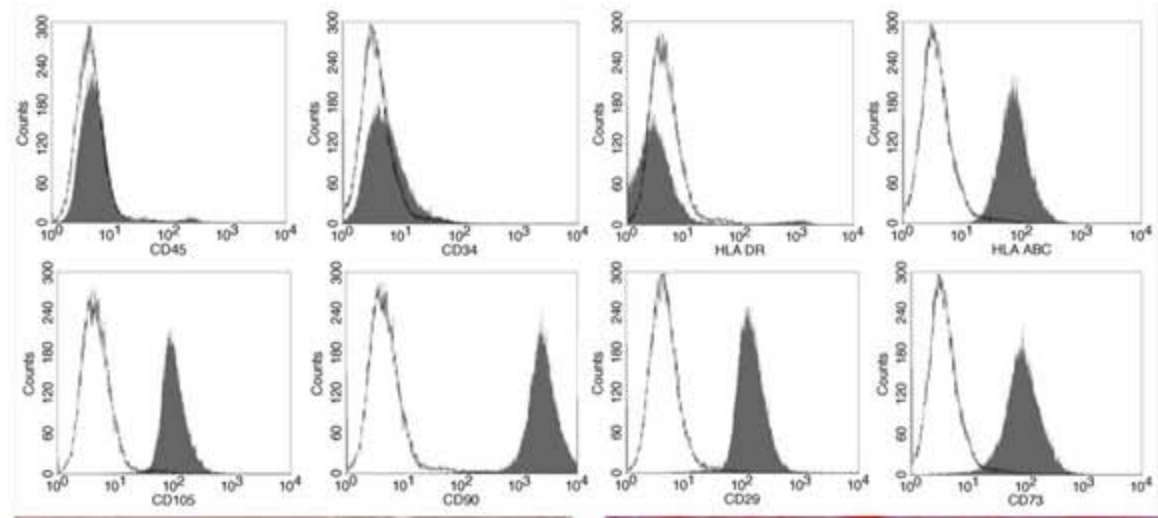**B**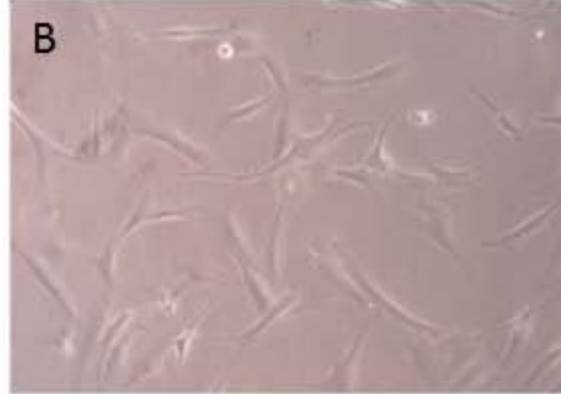**C**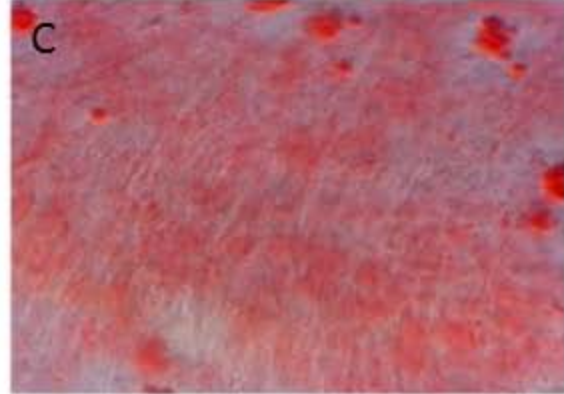**D**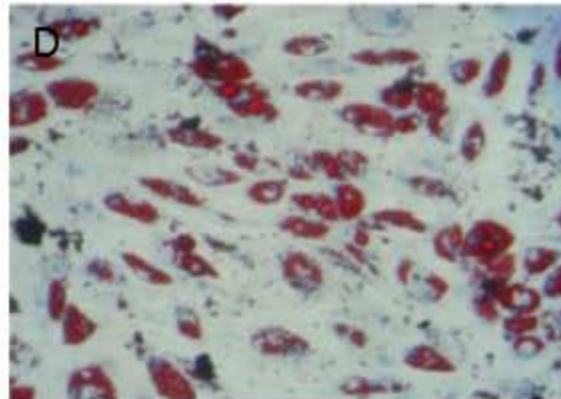**E**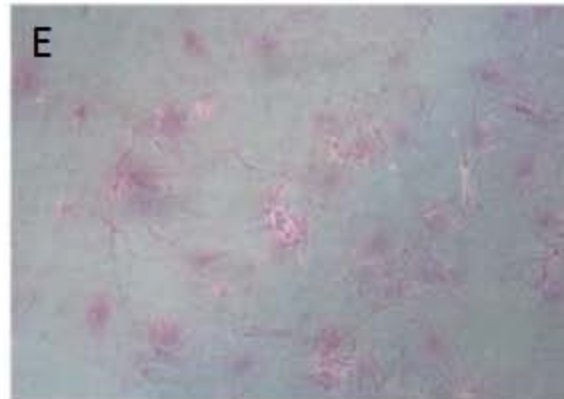

Supplement: srep16167-s1.pdf [file srep16167-s1.pdf]
